# Supplementary material
Source: HighWire-hosted journal article supplement (http://annfammed.org/highwire/filestream/8812/field_highwire_adjunct_files/0/Aslan_Supp_Figures.pdf)
Supplement: Aslan_Supp_Figures.pdf [file Aslan_Supp_Figures.pdf]

Supplemental materials for:

Aslan NÇ, Güler Ş, Demirci K, Isiyel E. Features of terra firma-forme dermatosis. *Ann Fam Med*. 2018;16(1):52-54.

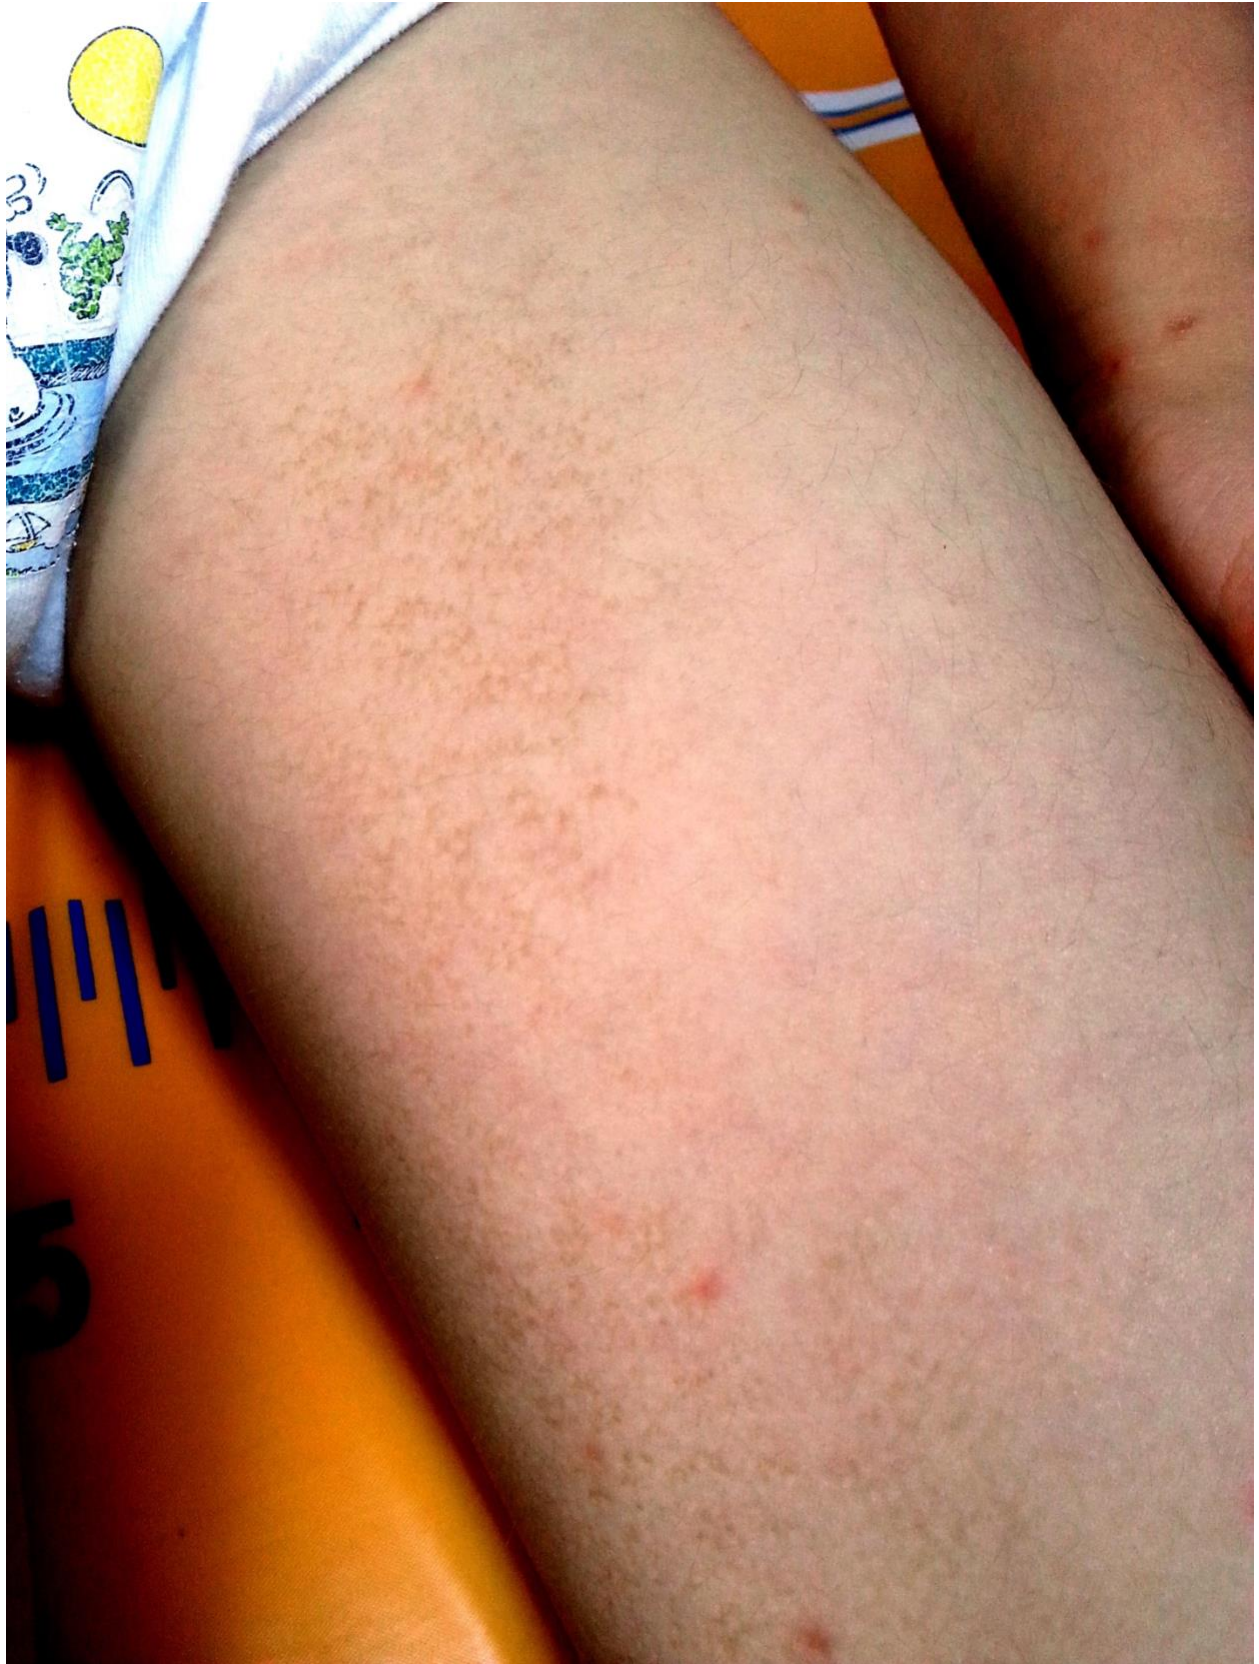

This supplemental material has been supplied by the authors and has not been edited by the Annals of Family Medicine.

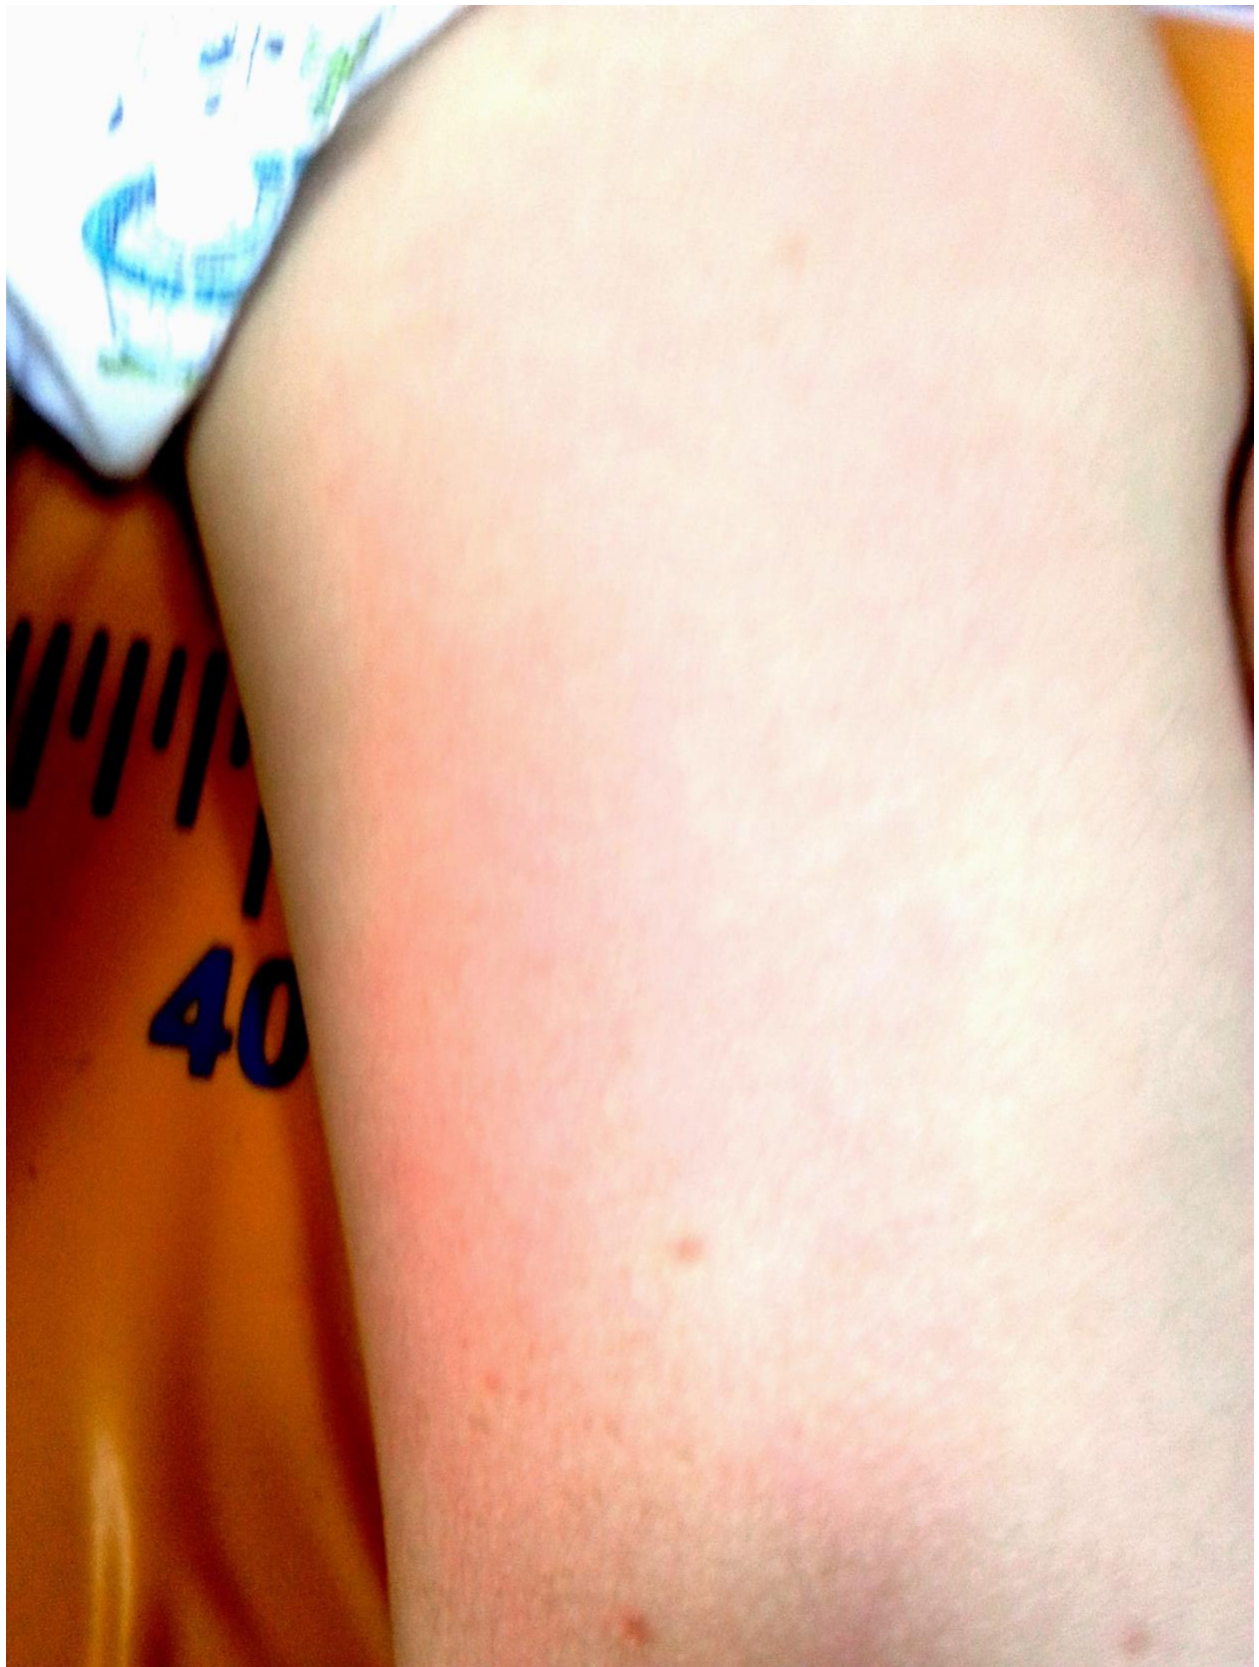

This supplemental material has been supplied by the authors and has not been edited by the Annals of Family Medicine.
